# Supplementary material
Source: PubMed Central journal article supplement (PMC3642166)
Supplement: mmc1.pdf [file mmc1.pdf]

## Supplementary Materials

**Suppl. Fig. 1. Separation of PA by LC/ESI-MS under previously reported conditions.** (A and B) PAs in MEFs separated by the Accela LC System using mobile phases described in T.R. Pettitt *et. al.* [23] (A) and G. Shui *et. al.* [24] (B). Gradient elution programs were optimized for UK-Silica column. Abbreviations: I.S., internal standard, PA, phosphatidic acid; PC, phosphatidylcholine; PE, phosphatidylethanolamine; PG, phosphatidylglycerol; PI, phosphatidylinositol; PS, phosphatidylserine; SM, sphingomyelin.

**Suppl. Fig. 2. The reproducibility of quantitative detection of cellular PA species in MEFs.** (A and B) The repeated experiments between periods on a given study day (A, within-day reproducibility) and between the three study days (B, between-day reproducibility). The values are presented as the means  $\pm$  S.D. ( $n = 3$ ).

**Suppl. Fig. 3. Profiles of PA species in mammalian cells (COS7, C2C12 and HeLa).** (A, C, E) Molecular composition of diacyl-PAs in COS7 cells (A), C2C12 cells (C) and HeLa cells (E). (B, D, F) Molecular composition of alkyl-acyl-PAs in COS7 cells (B), C2C12 cells (D) and HeLa cells (F). The values are presented as the means  $\pm$  S.D. ( $n = 3$ ). N.D., not detected.

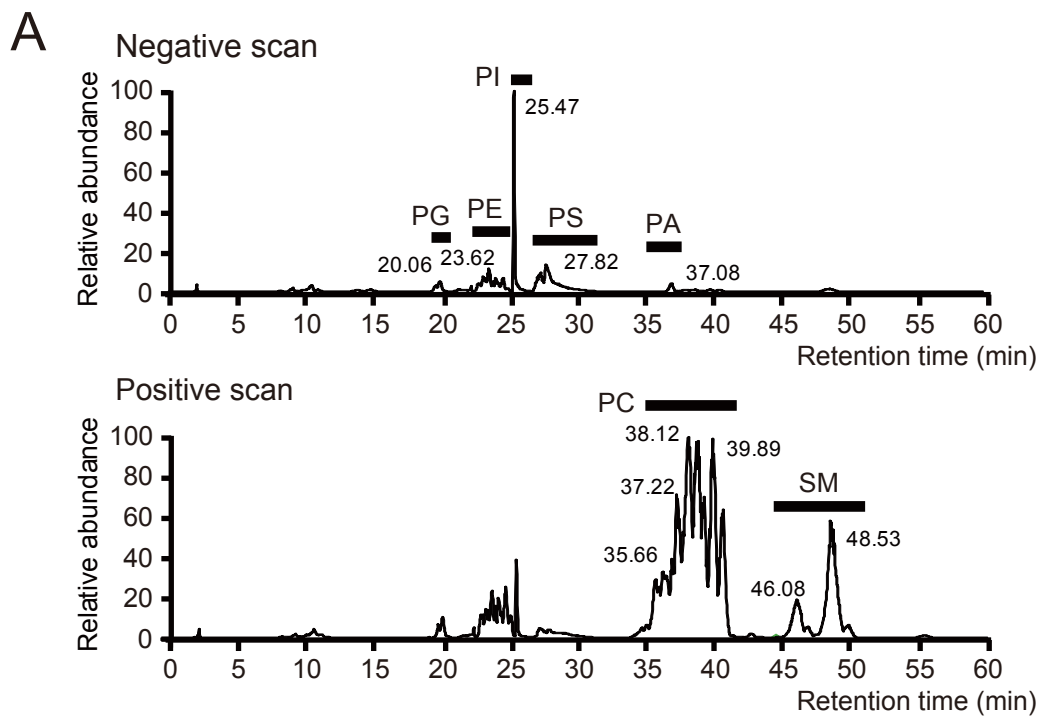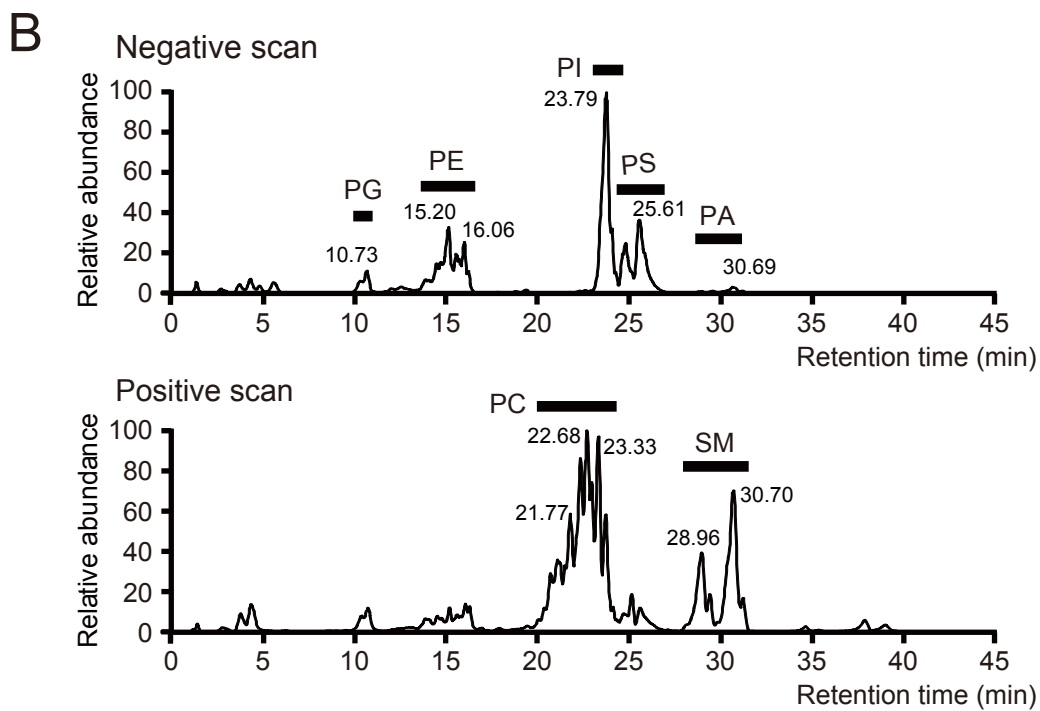

Suppl. Fig. 1

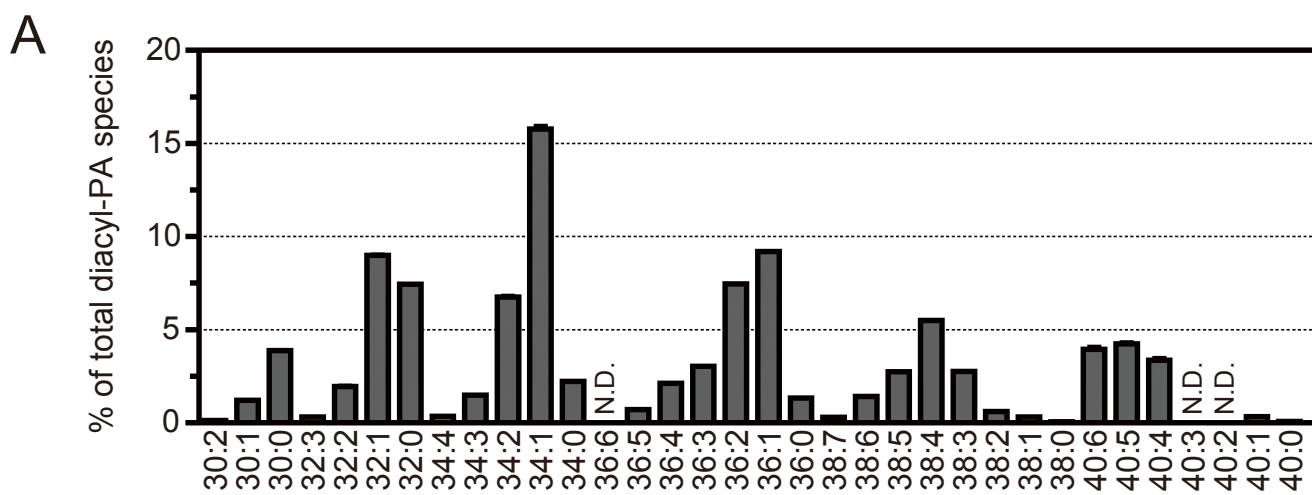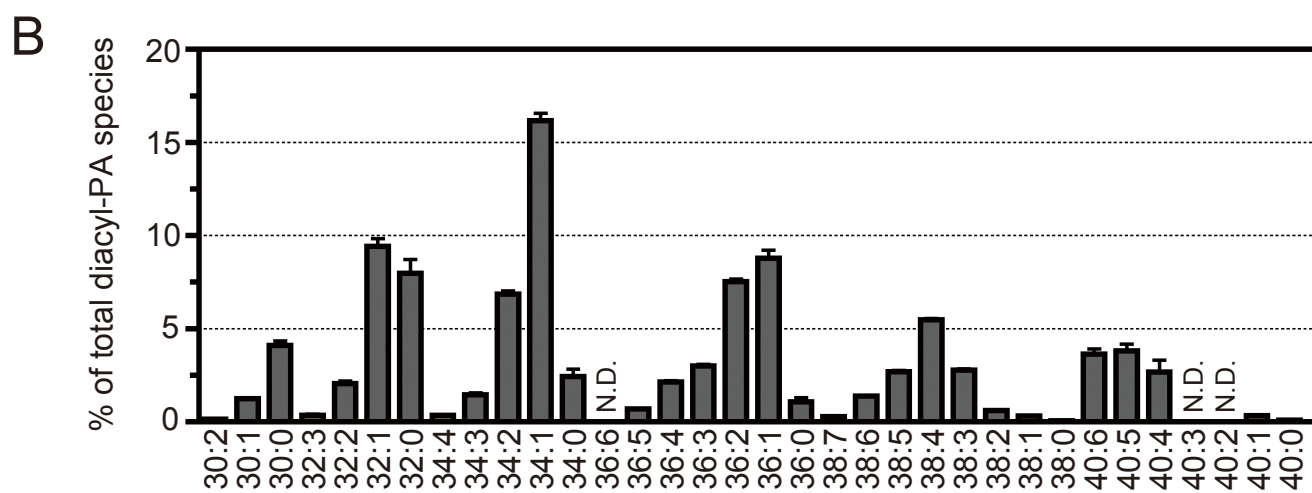

Suppl. Fig. 2

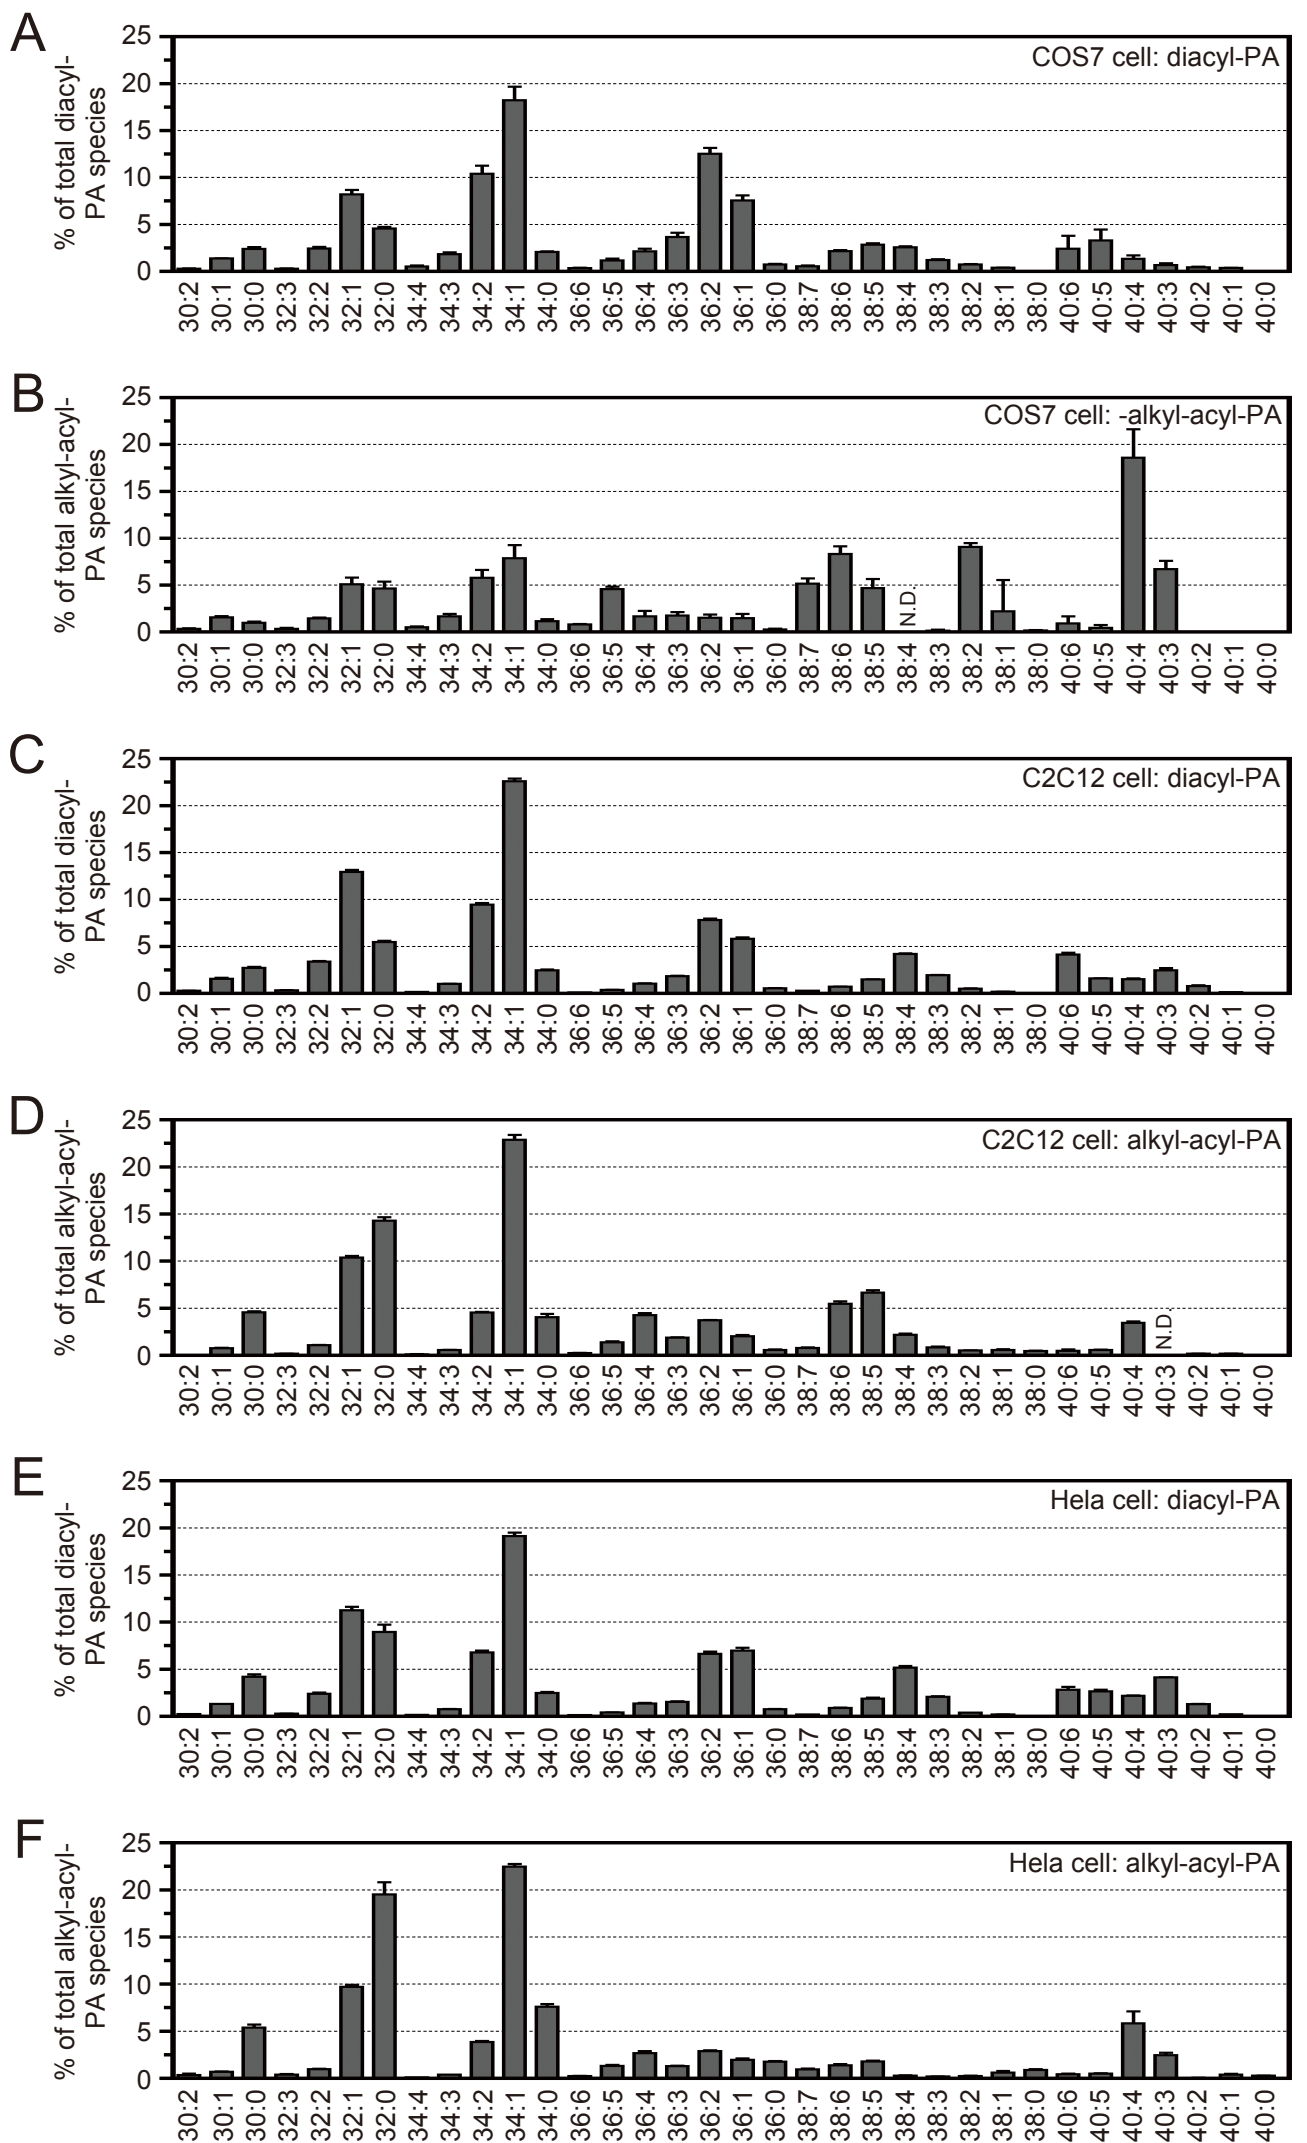

Suppl. Fig. 3
